# Supplementary material for: Cecum microbiome and metabolism characteristics of Silky Fowl and White Leghorn chicken in late laying stages
Source: Front Microbiol. 2022 Oct 20;13:984654. doi: 10.3389/fmicb.2022.984654 (PMC9633115; doi:10.3389/fmicb.2022.984654)
Supplement: Supplementary file 2 [file Table_2.XLSX]

## Sheet: Sheet1
Supplementary Table 2 The specific information of 397 significantly differential expressed genes.
id	baseMean	baseMean_WL	baseMean_SF	foldChange (SF/WL)	log2FoldChange	pval	padj	Regulation	Chromosome	Start Site	End Site	Direction	Length	Name	GO	KEGG	EC	eggNOG Class	eggNOG	Description	Entrez_geneID	UniProtAC
ENSGALG00000048430	80.0118	144.398	15.6254	0.108211	-3.20808	1.16782e-17	1.8802e-13	Down Regulation	KZ626839.1	545825	559107	-	2022	-	GO:0016787;	-	-	-	-	extensin-like [Source:NCBI gene;Acc:101748916]	-	-
ENSGALG00000054322	21.6876	43.0221	0.353017	0.00820546	-6.9292	4.55567e-17	3.66731e-13	Down Regulation	KZ626835.1	1193737	1204943	-	9539	-	GO:0008154;GO:0015629;GO:0016020;GO:0016021;GO:0008154;GO:0015629;GO:0016020;GO:0016021;GO:0008154;GO:0015629;GO:0016020;GO:0016021;GO:0008154;GO:0015629;GO:0016020;GO:0016021;GO:0005884;GO:0008154;GO:0015629;GO:0016020;GO:0016021;GO:0030048;GO:0008154;GO:0015629;GO:0016020;GO:0016021;GO:0008154;GO:0015629;GO:0016020;GO:0016021;	-	-	-	-	-	-	-
ENSGALG00000052192	2155.56	3329.83	981.29	0.294697	-1.7627	1.07061e-14	5.74558e-11	Down Regulation	33	7125098	7127729	+	1901	-	GO:0003924;GO:0005200;GO:0005525;GO:0005874;GO:0007017;	-	-	-	-	tubulin alpha-1A chain-like [Source:NCBI gene;Acc:100859737]	-	-
ENSGALG00000012834	226.558	363.902	89.2142	0.24516	-2.0282	5.95769e-14	2.39797e-10	Down Regulation	1	56550352	56584722	+	1609	AKR1D1	GO:0004032;GO:0005829;GO:0005829;GO:0005829;GO:0006699;GO:0006699;GO:0006707;GO:0006707;GO:0007586;GO:0007586;GO:0008202;GO:0008207;GO:0008207;GO:0008209;GO:0008209;GO:0008209;GO:0016229;GO:0016491;GO:0016491;GO:0047086;GO:0047568;GO:0055114;GO:0055114;GO:0055114;GO:0055114;	K00251	EC:1.3.1.3	C;K;E	04F5X;09V48;0V63V;KOG1577;0DNV7;12P3Z;1CSYT	aldo-keto reductase family 1 member D1 [Source:NCBI gene;Acc:418107]	418107	-
ENSGALG00000034212	63.2305	14.8245	111.636	7.53054	2.91275	8.24266e-13	2.65414e-09	Up Regulation	7	22324052	22340990	+	5888	CFAP65	GO:0001669;GO:0002080;GO:0005737;GO:0005886;GO:0005929;GO:0007288;GO:0016020;GO:0016021;GO:0030030;GO:0030317;GO:0031410;GO:0031514;GO:0036126;GO:0042995;GO:0097225;GO:0001669;GO:0001669;GO:0002080;GO:0005737;GO:0005737;GO:0005737;GO:0005886;GO:0005929;GO:0007288;GO:0007288;GO:0016020;GO:0016021;GO:0030030;GO:0030317;GO:0030317;GO:0031410;GO:0031514;GO:0036126;GO:0036126;GO:0036126;GO:0042995;GO:…	-	-	-	-	cilia and flagella associated protein 65 [Source:NCBI gene;Acc:424206]	-	-
ENSGALG00000048754	66.7354	26.7474	106.723	3.99004	1.9964	2.28294e-12	6.1259e-09	Up Regulation	23	6121716	6128518	+	1677	-	-	-	-	-	-	-	-	-
ENSGALG00000048325	347.144	165.545	528.743	3.19395	1.67534	3.60992e-12	8.30282e-09	Up Regulation	12	2706975	2709494	-	2127	GBP	GO:0003924;GO:0005525;GO:0003924;GO:0005525;	-	-	-	-	guanylate binding protein [Source:NCBI gene;Acc:395366]	-	-
ENSGALG00000047202	12.5738	22.9202	2.22745	0.097183	-3.36315	1.21949e-11	2.45423e-08	Down Regulation	33	2920707	2953251	+	2565	-	GO:0016020;GO:0016021;GO:0016020;GO:0016021;	-	-	-	-	-	-	-
ENSGALG00000040260	1815.58	930.316	2700.84	2.90314	1.53761	2.05458e-11	3.67542e-08	Up Regulation	33	7109678	7113350	-	1475	-	GO:0003924;GO:0005200;GO:0005525;GO:0005874;GO:0007017;	K07374	-	-	-	tubulin alpha-1C chain-like [Source:NCBI gene;Acc:100857858]	100857858	-
ENSGALG00000043848	20.6817	39.3889	1.97458	0.0501305	-4.31817	1.67765e-10	2.46681e-07	Down Regulation	4	85720933	85726738	-	657	-	GO:0002456;GO:0005886;GO:0007166;GO:0009897;GO:0016020;GO:0016021;GO:0045065;	-	-	-	-	-	-	-
ENSGALG00000023552	54.7659	85.6261	23.9057	0.279187	-1.8407	1.6854e-10	2.46681e-07	Down Regulation	Z	10794665	10840965	+	6236	SPEF2	GO:0005515;	-	-	S;T	12PZH;0IEY9;1CS59;0DHF5;09W5R;04KYT;0V745	sperm flagellar 2 [Source:NCBI gene;Acc:427435]	-	-
ENSGALG00000043671	174.008	67.219	280.796	4.17734	2.06258	2.3234e-10	3.00512e-07	Up Regulation	16	1391736	1651259	+	3008	-	GO:0001650;GO:0005096;GO:0005654;GO:0005794;GO:0005938;GO:0007264;GO:0015629;GO:0043547;	-	-	-	-	-	-	-
ENSGALG00000003286	28.4489	9.43956	47.4582	5.02758	2.32986	2.44419e-10	3.00512e-07	Up Regulation	10	4198612	4227772	+	2574	ACSBG1	GO:0000038;GO:0001676;GO:0004467;GO:0004467;GO:0005737;GO:0005737;GO:0005783;GO:0005886;GO:0016405;GO:0031957;GO:0042759;GO:0051384;	K15013	EC:6.2.1.3	I	0DJUK;1CUMS;12WBF;0V9C5;KOG1256;09YED	acyl-CoA synthetase bubblegum family member 1 [Source:NCBI gene;Acc:415361]	415361	-
ENSGALG00000015205	18.456	0	36.912	Inf	Inf	2.61315e-10	3.00512e-07	Up Regulation	Z	30823102	30833822	-	1965	TYRP1	GO:0004503;GO:0005737;GO:0010008;GO:0016491;GO:0030669;GO:0048023;GO:0097708;	K00506	EC:1.14.18.-	Q;G	0V9WZ;1CV8A;12RIX;09YZB;0DKE8;0IEEB;04N3Q	tyrosinase related protein 1 [Source:NCBI gene;Acc:395913]	395913	F1NXQ4
ENSGALG00000035818	41.2413	75.3445	7.13806	0.0947389	-3.3999	4.72183e-10	5.0681e-07	Down Regulation	33	4895192	4926729	+	2625	-	-	-	-	-	-	-	-	-
ENSGALG00000051266	785.75	427.673	1143.83	2.67454	1.41929	6.04333e-10	6.0811e-07	Up Regulation	20	10886028	10887227	+	1117	-	GO:0000275;GO:0000275;GO:0005743;GO:0015986;GO:0015986;GO:0016887;GO:0045261;GO:0046933;GO:0046933;GO:0000275;GO:0000275;GO:0005743;GO:0015986;GO:0015986;GO:0016887;GO:0045261;GO:0046933;GO:0046933;	-	-	-	-	ATP synthase, H+ transporting, mitochondrial F1 complex, epsilon subunit [Source:NCBI gene;Acc:768660]	-	-
ENSGALG00000045540	411.667	674.874	148.461	0.219983	-2.18454	1.99335e-09	1.88782e-06	Down Regulation	1	27209	33555	+	955	-	-	-	-	-	-	C-type lectin domain family 2 member D-like 5 [Source:NCBI gene;Acc:776458]	-	-
ENSGALG00000011970	117.588	207.219	27.9571	0.134915	-2.88987	2.50226e-09	2.23813e-06	Down Regulation	1	49754389	49758184	+	2880	CHADL	GO:0005515;GO:0005518;GO:0032331;GO:0062023;GO:0062023;GO:0098633;GO:1904027;	-	-	T	KOG0619;1CQPD;0DFZX;13HRP;0V5PM;09UQ0;04MWG	chondroadherin-like [Source:NCBI gene;Acc:417998]	417998	F1NHD7
ENSGALG00000048912	15.1931	4.55411	25.832	5.67225	2.50392	3.97239e-09	3.36608e-06	Up Regulation	16	1273838	1275807	+	1384	-	GO:0005096;GO:0007264;GO:0043547;	-	-	-	-	-	-	-
ENSGALG00000042708	236.62	80.7781	392.463	4.85853	2.28052	5.71925e-09	4.60399e-06	Up Regulation	16	850033	852546	+	647	-	GO:0001650;GO:0005096;GO:0005654;GO:0005794;GO:0005938;GO:0007264;GO:0015629;GO:0043547;	-	-	-	-	-	-	-
ENSGALG00000051595	19.504	5.13236	33.8756	6.60039	2.72255	7.37618e-09	5.65507e-06	Up Regulation	31	5815164	5817830	+	1257	-	GO:0016020;GO:0016021;	-	-	-	-	-	-	-
ENSGALG00000004245	473.345	679.137	267.553	0.39396	-1.34388	1.21157e-08	8.86645e-06	Down Regulation	14	3479887	3483891	+	1049	NUDT1	GO:0003924;GO:0005634;GO:0005737;GO:0005739;GO:0005759;GO:0005829;GO:0006195;GO:0006203;GO:0006203;GO:0006281;GO:0008413;GO:0008413;GO:0008413;GO:0016787;GO:0030515;GO:0035539;GO:0036219;GO:0042262;GO:0046061;GO:0047693;GO:0006281;GO:0008413;	K17816	-	-	-	nudix hydrolase 1 [Source:NCBI gene;Acc:416467]	416467	Q5ZKC6;F7BGT1
ENSGALG00000044592	296.089	534.949	57.23	0.106982	-3.22456	1.37181e-08	9.22868e-06	Down Regulation	31	5430421	5431759	-	582	-	GO:0005515;	-	-	-	-	-	-	-
ENSGALG00000013684	15.2373	28.2857	2.1889	0.0773851	-3.6918	1.3757e-08	9.22868e-06	Down Regulation	4	63861918	64214244	+	1704	SGCZ	GO:0016012;GO:0016021;GO:0005886;GO:0016012;GO:0016012;GO:0016021;	-	-	Z	KOG3950;0DG5W;09UWG;13PRR;0V5W6;1CQVG;04HBH	sarcoglycan zeta [Source:NCBI gene;Acc:422739]	422739	-
ENSGALG00000001740	391.947	582.241	201.654	0.346341	-1.52974	1.53241e-08	9.86875e-06	Down Regulation	18	4171183	4209840	-	1455	MGAT5B	GO:0000139;GO:0005794;GO:0005794;GO:0005794;GO:0006486;GO:0006487;GO:0006487;GO:0006487;GO:0006487;GO:0016020;GO:0016021;GO:0016740;GO:0016757;GO:0018215;GO:0018242;GO:0030144;GO:0030144;GO:0030144;GO:0030144;GO:0030144;GO:0030144;GO:0030145;	K09661	EC:2.4.1.-	-	-	alpha-1,6-mannosylglycoprotein 6-beta-N- acetylglucosaminyltransferase B [Source:HGNC Symbol;Acc:HGNC:24140]	427801	-
ENSGALG00000026152	3291.24	1469.51	5112.97	3.47937	1.79882	1.66538e-08	1.03126e-05	Up Regulation	12	2699650	2704153	-	2121	-	GO:0003924;GO:0005525;GO:0003924;GO:0005525;GO:0003924;GO:0005525;GO:0003924;GO:0005525;	K20899	-	-	-	guanylate-binding protein 4-like [Source:NCBI gene;Acc:415922]	415922	A0A1D5P4F3
ENSGALG00000042023	447.93	650.488	245.373	0.377214	-1.40654	3.70896e-08	2.21164e-05	Down Regulation	1	39057	42408	-	2161	-	GO:0016020;GO:0016021;	-	-	-	-	-	-	-
ENSGALG00000042454	4.44995	0.258439	8.64146	33.4371	5.06338	5.03378e-08	2.89443e-05	Up Regulation	2	57871050	57926992	+	1814	DCDC2	GO:0005929;GO:0007605;GO:0030111;GO:0035556;GO:1902017;GO:0005654;GO:0005737;GO:0005829;GO:0005929;GO:0005929;GO:0005930;GO:0007605;GO:0007605;GO:0015630;GO:0030111;GO:0030111;GO:0034451;GO:0035556;GO:0045880;GO:0060271;GO:0072686;GO:1902017;GO:1902017;	K23405	-	-	-	doublecortin domain containing 2 [Source:NCBI gene;Acc:420821]	420821	A0A1D5PED4
ENSGALG00000007439	2943.7	1756.27	4131.12	2.35221	1.23402	5.21637e-08	2.89598e-05	Up Regulation	20	10872054	10877912	+	2830	PRELID3B	GO:0005758;	-	-	-	-	PRELI domain containing 3B [Source:NCBI gene;Acc:419310]	419310	Q5F3S7
ENSGALG00000016899	19.9027	0	39.8054	Inf	Inf	5.56642e-08	2.98731e-05	Up Regulation	1	147901713	147921618	+	2094	DCT	GO:0002052;GO:0004167;GO:0005737;GO:0005829;GO:0005886;GO:0006583;GO:0009637;GO:0016491;GO:0021847;GO:0042438;GO:0042470;GO:0043231;GO:0043473;GO:0048066;GO:0048468;	K01827	EC:5.3.3.12	-	-	dopachrome tautomerase [Source:NCBI gene;Acc:395775]	395775	O93505
ENSGALG00000019651	26.3522	41.3396	11.3649	0.274916	-1.86294	1.39219e-07	7.2304e-05	Down Regulation	2	28590281	28597092	-	934	AGR3	GO:0002162;GO:0005783;GO:0043231;	K20357	-	O	0DQQC;0IWAH;04HTK;1CZTI;0VCKY;0A3X0;13PWP	anterior gradient 3, protein disulphide isomerase family member [Source:NCBI gene;Acc:420597]	420597	F1NLZ0
ENSGALG00000045671	242.49	347.859	137.121	0.394187	-1.34305	2.6798e-07	0.000134827	Down Regulation	14	14193311	14205059	-	3195	-	-	-	-	-	-	uncharacterized LOC416755 [Source:NCBI gene;Acc:416755]	416755	A0A1L1RV25
ENSGALG00000007447	356.59	188.863	524.318	2.77618	1.4731	2.981e-07	0.000145437	Up Regulation	20	10887341	10892358	-	3079	TUBB1	GO:0000166;GO:0000226;GO:0000278;GO:0003924;GO:0003924;GO:0005200;GO:0005200;GO:0005200;GO:0005200;GO:0005525;GO:0005525;GO:0005525;GO:0005525;GO:0005737;GO:0005737;GO:0005737;GO:0005856;GO:0005874;GO:0005874;GO:0005874;GO:0005874;GO:0005874;GO:0007017;GO:0007017;GO:0007017;GO:0051225;	K07375	-	Z	1CW8N;0V4MV;04F43;KOG1375;0DMDC;13JNB;09ZUT	tubulin beta 1 class VI [Source:NCBI gene;Acc:396427]	396427	P09207
ENSGALG00000001702	249.416	353.727	145.105	0.410219	-1.28554	4.17753e-07	0.000197818	Down Regulation	11	979152	987407	-	3237	EXOC3L1	GO:0000145;GO:0000145;GO:0006887;GO:0006887;GO:0030072;GO:0030141;	K19987	-	U	1CQAH;09UB5;KOG2286;0V5AA;13IVR;0DFKU;04KX7	exocyst complex component 3 like 1 [Source:NCBI gene;Acc:769364]	769364	E1BUJ3
ENSGALG00000019756	4.58377	0	9.16755	Inf	Inf	4.43204e-07	0.000203874	Up Regulation	Z	27814456	27819700	+	649	MLANA	GO:0005789;GO:0005794;GO:0005802;GO:0042470;GO:0042470;	K17303	-	-	-	melan-A [Source:NCBI gene;Acc:769648]	769648	E1C403
ENSGALG00000039205	76.4929	122.578	30.4074	0.248065	-2.01121	4.63793e-07	0.000207419	Down Regulation	25	2074652	2086546	-	1617	-	GO:0005524;GO:0006457;GO:0051082;	K09495	-	-	-	T-complex protein 1 subunit gamma-like [Source:NCBI gene;Acc:101751456]	425644	-
ENSGALG00000022137	285.371	12.2386	558.503	45.6347	5.51206	4.94638e-07	0.000215234	Up Regulation	25	3860483	3861621	+	684	CRP	-	K16143	-	S	0V9WT;1CV84;09YZ5;0DKE2;04PEA;13SFW;0J1FD	C-reactive protein, pentraxin-related [Source:NCBI gene;Acc:429786]	429786	Q2EJU6
ENSGALG00000021183	17.9486	28.5695	7.32773	0.256488	-1.96304	5.97693e-07	0.000253233	Down Regulation	10	12600776	12605757	-	1213	CFAP161	-	-	-	S	04JV5;13KKD;1CX6Y;0VAZU;0DK6Z;0A4B9;0IJK1	cilia and flagella associated protein 161 [Source:NCBI gene;Acc:415471]	-	-
ENSGALG00000015495	10.3549	3.21192	17.4978	5.44777	2.44567	7.35973e-07	0.000303825	Up Regulation	1	94257934	94273544	+	3440	POU1F1	GO:0000981;GO:0000981;GO:0001085;GO:0001102;GO:0003677;GO:0003700;GO:0003700;GO:0005634;GO:0005654;GO:0005829;GO:0006355;GO:0006355;GO:0045944;GO:1990837;GO:0000981;GO:0003677;GO:0003700;GO:0006355;	K09363	-	-	-	POU class 1 homeobox 1 [Source:NCBI gene;Acc:374215]	374215	O57599
ENSGALG00000050737	4.48424	8.46042	0.508058	0.0600512	-4.05766	9.9096e-07	0.000398862	Down Regulation	31	3024382	3025744	+	407	-	GO:0001676;GO:0004467;GO:0004467;GO:0004467;GO:0005324;GO:0005783;GO:0006699;GO:0006699;GO:0015245;GO:0015245;GO:0015908;GO:0015909;GO:0016021;GO:0016021;GO:0031957;GO:0031957;	-	-	-	-	-	-	-
ENSGALG00000045788	553.204	347.661	758.748	2.18244	1.12594	1.13761e-06	0.00044672	Up Regulation	KZ626834.1	159512	163113	-	906	PSMB6	GO:0000502;GO:0004298;GO:0005654;GO:0005829;GO:0005839;GO:0051603;	-	-	-	-	proteasome subunit beta type-6-like [Source:NCBI gene;Acc:107049719]	-	-
ENSGALG00000048572	15.6937	25.244	6.14342	0.243361	-2.03883	1.53869e-06	0.000589832	Down Regulation	4	85722927	85900720	-	1963	-	-	-	-	-	-	T-cell surface glycoprotein CD8 alpha chain-like [Source:NCBI gene;Acc:771880]	-	-
ENSGALG00000044755	9.70684	16.7066	2.70705	0.162034	-2.62563	1.83203e-06	0.000685945	Down Regulation	4	85681134	85784648	-	1049	-	GO:0002456;GO:0005886;GO:0007166;GO:0009897;GO:0016020;GO:0016021;GO:0045065;	-	-	-	-	-	-	-
ENSGALG00000031094	36.5571	53.7509	19.3632	0.360239	-1.47297	2.26602e-06	0.00079602	Down Regulation	4	382800	392016	-	1868	EDA2R	GO:0005515;GO:0005887;	K05163	-	-	-	ectodysplasin A2 receptor [Source:NCBI gene;Acc:422166]	422166	A2SWM7
ENSGALG00000051072	55.9133	21.5382	90.2885	4.19202	2.06765	2.29437e-06	0.00079602	Up Regulation	16	912011	976071	+	838	-	GO:0005096;GO:0007264;GO:0043547;	-	-	-	-	-	-	-
ENSGALG00000015313	128.336	178.537	78.1354	0.437642	-1.19218	2.30006e-06	0.00079602	Down Regulation	3	67850522	67962399	+	1185	PDSS2	GO:0000010;GO:0000010;GO:0005829;GO:0006744;GO:0006744;GO:0008299;GO:0008299;GO:0008299;GO:0021549;GO:0046982;GO:0050347;GO:0050878;GO:0097269;GO:1990234;GO:1990234;GO:0008299;GO:0008299;GO:0008299;GO:0016740;	K12505	EC:2.5.1.91	-	-	prenyl (decaprenyl) diphosphate synthase, subunit 2 [Source:NCBI gene;Acc:421777]	421777	E1C4Y7
ENSGALG00000050921	11.1728	19.6866	2.65889	0.135061	-2.88832	2.32378e-06	0.00079602	Down Regulation	31	3020724	3022927	+	575	-	GO:0001676;GO:0004467;GO:0004467;GO:0004467;GO:0005324;GO:0005783;GO:0015908;GO:0015908;GO:0015909;GO:0016021;GO:0016021;GO:0031957;GO:0031957;	-	-	-	-	-	-	-
ENSGALG00000049362	10.4746	0.507015	20.4421	40.3186	5.33337	2.70557e-06	0.000890968	Up Regulation	31	1964831	1966935	+	1872	-	-	-	-	-	-	immunoglobulin-like receptor CHIR-B6 [Source:NCBI gene;Acc:429646]	-	-
ENSGALG00000034527	30.3728	11.1799	49.5656	4.43344	2.14843	2.71164e-06	0.000890968	Up Regulation	KZ626819.1	66321	77139	-	1769	-	GO:0006355;GO:0006355;GO:0046872;	-	-	-	-	zinc finger protein 501-like [Source:NCBI gene;Acc:107057116]	-	-
ENSGALG00000049660	8.41434	14.3752	2.45352	0.170678	-2.55065	2.93329e-06	0.000944518	Down Regulation	31	3824746	3828847	+	1227	-	-	-	-	-	-	-	-	-
ENSGALG00000012457	22.4904	4.68304	40.2978	8.60505	3.10518	3.0282e-06	0.00095596	Up Regulation	1	51425940	51431518	+	2489	SSTR3	GO:0004930;GO:0004994;GO:0005102;GO:0005886;GO:0005929;GO:0005929;GO:0007186;GO:0016021;GO:0060170;GO:0097730;	-	-	T	KOG3656;0V655;04NZW;0DGEK;13JMY;09V5H;1CR43	somatostatin receptor 3 [Source:NCBI gene;Acc:427907]	-	-
ENSGALG00000051008	31.8945	47.1146	16.6744	0.353912	-1.49854	4.5619e-06	0.00140969	Down Regulation	15	11091732	11092979	-	309	-	-	-	-	-	-	-	-	-
ENSGALG00000010949	81.8239	7.0578	156.59	22.1868	4.47163	4.64058e-06	0.00140969	Up Regulation	2	31127614	31144995	+	3689	GPNMB	GO:0001934;GO:0005178;GO:0005887;GO:0007155;GO:0008201;GO:0031410;GO:0032720;GO:0034103;GO:0070374;	-	-	S	0VESI;0A3XQ;0IE9P;0DPKX;12T0E;1CYK0;04JJU	glycoprotein nmb [Source:NCBI gene;Acc:428431]	-	-
ENSGALG00000048306	51.6453	29.9239	73.3667	2.45177	1.29383	4.97265e-06	0.00148259	Up Regulation	26	5400955	5403822	-	2868	-	GO:0016020;GO:0016021;	-	-	-	-	-	-	-
ENSGALG00000005349	13.6301	4.71452	22.5458	4.7822	2.25768	5.6695e-06	0.00165962	Up Regulation	14	6400336	6409625	-	2651	MSLN	-	K20733	-	S	09YMS;12P05;0V9JI;0DK2C;0IIJH;1CUW4;04F67	mesothelin [Source:NCBI gene;Acc:416534]	416534	-
ENSGALG00000028895	4.51304	0.731973	8.2941	11.3312	3.50222	8.13208e-06	0.00233797	Up Regulation	14	13226354	13229728	+	1458	-	GO:0004888;GO:0004888;GO:0004930;GO:0004930;GO:0004930;GO:0004967;GO:0004967;GO:0005886;GO:0005886;GO:0007165;GO:0007166;GO:0007166;GO:0007186;GO:0007186;GO:0007186;GO:0007188;GO:0008528;GO:0016020;GO:0016020;GO:0016020;GO:0016021;GO:0016021;GO:0016021;GO:0017046;GO:0071377;	K04583	-	-	-	glucagon receptor-like [Source:NCBI gene;Acc:772096]	772096	C0J3M4
ENSGALG00000054645	4.15426	8.0441	0.264424	0.0328718	-4.927	8.44559e-06	0.00238551	Down Regulation	Z	77999777	78598394	-	1964	-	GO:0000398;GO:0003677;GO:0003677;GO:0005634;GO:0005634;GO:0005634;GO:0006355;GO:0006355;	-	-	-	-	-	-	-
ENSGALG00000039727	120.025	75.3587	164.69	2.18542	1.12791	8.89404e-06	0.00246886	Up Regulation	6	1251914	1267478	+	3308	-	GO:0005887;GO:0008028;GO:0015718;GO:0016020;GO:0016021;GO:0016021;GO:0005887;GO:0008028;GO:0015718;GO:0016020;GO:0016021;GO:0016021;GO:0005887;GO:0008028;GO:0015718;GO:0016020;GO:0016021;GO:0016021;	-	-	-	-	-	-	-
ENSGALG00000009135	447.402	601.357	293.447	0.487974	-1.03512	1.02696e-05	0.00280239	Down Regulation	7	15386468	15401754	-	2789	PLEKHA3	GO:0005794;GO:0042802;GO:0070273;	K20313	-	T;G	04IWC;0V91H;12TAW;0DPM7;KOG3221;1CYK7;0A1ZF	pleckstrin homology domain containing A3 [Source:NCBI gene;Acc:424128]	424128	Q5ZL31
ENSGALG00000009977	1000.29	1353.59	646.991	0.477981	-1.06497	1.44282e-05	0.00387157	Down Regulation	4	31116058	31162776	+	3338	SMAD1	GO:0000785;GO:0000978;GO:0000981;GO:0003677;GO:0003700;GO:0005515;GO:0005634;GO:0005634;GO:0005667;GO:0005667;GO:0005737;GO:0006355;GO:0006355;GO:0007179;GO:0007179;GO:0007179;GO:0009653;GO:0030154;GO:0030509;GO:0031410;GO:0046872;GO:0060395;GO:0070411;GO:0071144;GO:0000165;GO:0000785;GO:0000978;GO:0000978;GO:0000978;GO:0000981;GO:0001228;GO:0001657;GO:0001710;GO:0002051;GO:0003677;GO:0003700;GO:…	K04676	-	-	-	SMAD family member 1 [Source:NCBI gene;Acc:395680]	395680	Q56IA0
ENSGALG00000032385	23.1701	34.3334	12.0068	0.349712	-1.51576	1.54965e-05	0.00409007	Down Regulation	KZ626836.1	263831	268323	-	2142	PFKFB4	GO:0003824;GO:0003873;GO:0005524;GO:0006000;GO:0006003;GO:0003824;GO:0003824;GO:0003824;GO:0003873;GO:0003873;GO:0003873;GO:0003873;GO:0004331;GO:0004331;GO:0004331;GO:0005524;GO:0005524;GO:0005829;GO:0006000;GO:0006000;GO:0006003;GO:0006003;GO:0006003;GO:0006003;GO:0008152;GO:0016301;GO:0016310;GO:0016311;GO:0016787;GO:0042802;GO:0043540;GO:0043540;GO:0046835;	K19028	-	-	-	6-phosphofructo-2-kinase/fructose-2,6-biphosphatase 4 [Source:NCBI gene;Acc:415906]	415906	-
ENSGALG00000035350	61.3265	9.41887	113.234	12.022	3.58761	1.77826e-05	0.00461774	Up Regulation	33	7092009	7095774	+	2223	PMEL	GO:0005783;GO:0005789;GO:0005794;GO:0032438;GO:0032585;GO:0042470;GO:0042802;	K17304	-	-	-	premelanosome protein [Source:NCBI gene;Acc:396007]	396007	Q98917
ENSGALG00000003854	233.37	154.35	312.389	2.0239	1.01714	2.0004e-05	0.00511214	Up Regulation	15	5671460	5710128	-	3748	IFT81	GO:0005813;GO:0005929;GO:0007283;GO:0008589;GO:0015631;GO:0015631;GO:0030992;GO:0030992;GO:0035735;GO:0036064;GO:0042073;GO:0060271;GO:0060271;GO:0097225;GO:0097228;	K19677	-	U	04FVA;09Z6M;0IHK2;0VA3X;12TZ1;1CVH1;0DKNI	intraflagellar transport 81 [Source:NCBI gene;Acc:416839]	416839	-
ENSGALG00000054397	19.5012	1.86365	37.1387	19.9279	4.31672	2.19962e-05	0.00553343	Up Regulation	16	2019868	2064486	-	575	-	GO:0005615;GO:0009897;	-	-	-	-	-	-	-
ENSGALG00000005000	309.802	126.48	493.124	3.89882	1.96304	2.34987e-05	0.00569562	Up Regulation	6	15671950	15678555	+	1571	COMTD1	GO:0008171;	-	-	Q	13K8W;09XM0;0VECG;0DIYH;1CTPX;KOG1663;04KHK	catechol-O-methyltransferase domain containing 1 [Source:NCBI gene;Acc:423730]	-	-
ENSGALG00000048925	4.14408	0	8.28815	Inf	Inf	2.3559e-05	0.00569562	Up Regulation	4	23301032	23302621	+	1590	-	-	-	-	-	-	-	-	-
ENSGALG00000035916	63.9835	109.157	18.8096	0.172316	-2.53687	2.37023e-05	0.00569562	Down Regulation	5	18179810	18393764	-	4389	SHANK2	GO:0005515;GO:0007612;GO:0008284;GO:0030534;GO:0035176;GO:0035331;GO:0071625;	K15009	-	-	-	SH3 and multiple ankyrin repeat domains 2 [Source:NCBI gene;Acc:428858]	428858	-
ENSGALG00000027090	60.4702	87.3776	33.5627	0.384112	-1.3804	2.56585e-05	0.00607504	Down Regulation	4	85928419	85937631	+	3543	-	-	-	-	-	-	uncharacterized LOC422926 [Source:NCBI gene;Acc:422926]	422926	C7ACT2
ENSGALG00000027868	8.61037	3.12488	14.0959	4.51086	2.1734	3.10736e-05	0.00717988	Up Regulation	1	178476496	178478370	+	1875	AMER2	GO:0005546;GO:0005886;GO:0090090;	-	-	-	-	APC membrane recruitment protein 2 [Source:NCBI gene;Acc:418939]	-	-
ENSGALG00000016648	40.8555	18.5162	63.1947	3.41295	1.77102	3.12169e-05	0.00717988	Up Regulation	1	129773839	129788312	+	2016	-	GO:0003824;GO:0008484;GO:0003824;GO:0008484;	-	-	P;G	1CS2C;12T1I;0V6MV;0DHC8;KOG3867;09W32	arylsulfatase D [Source:NCBI gene;Acc:418658]	-	-
ENSGALG00000051628	47.3388	66.2579	28.4197	0.428925	-1.2212	3.17914e-05	0.00720904	Down Regulation	25	2473278	2475688	-	1214	-	GO:0002819;GO:0003823;GO:0006955;GO:0016020;GO:0016021;GO:0016021;GO:0038023;GO:0038023;GO:0002819;GO:0003823;GO:0006955;GO:0016020;GO:0016021;GO:0016021;GO:0038023;GO:0038023;	-	-	-	-	-	-	-
ENSGALG00000016577	14.2733	0.723005	27.8236	38.4832	5.26616	3.67866e-05	0.00822589	Up Regulation	3	105305216	105335944	+	5433	OTOF	GO:0005509;GO:0016021;GO:0016079;	K19949	-	M	09TCK;12QQ5;KOG1326;0DI4C;1CSUS;0V4BR	otoferlin [Source:NCBI gene;Acc:422007]	422007	-
ENSGALG00000012464	84.2458	147.237	21.2546	0.144356	-2.7923	3.94096e-05	0.0086917	Down Regulation	5	58929202	58939830	+	3324	SOUL	-	-	-	S	0VEHW;13PKV;04JIJ;1D0F6;0A3P3;0DNC8;0IVFH	SOUL protein [Source:NCBI gene;Acc:395567]	395567	Q9W6E5
ENSGALG00000033498	120.468	229.259	11.6758	0.0509283	-4.29539	4.41529e-05	0.00960623	Down Regulation	5	16172352	16180740	+	1083	-	GO:0000166;GO:0005524;GO:0005524;GO:0005634;GO:0005737;GO:0005788;GO:0016020;GO:0016887;GO:0030433;GO:0030968;GO:0031072;GO:0034620;GO:0034663;GO:0042026;GO:0044183;GO:0051082;GO:0051085;GO:0051787;	-	-	-	-	-	-	-
ENSGALG00000012985	10.8519	4.50741	17.1965	3.81515	1.93174	4.6575e-05	0.0099981	Up Regulation	1	60190170	60217228	-	2273	SLC6A13	GO:0005332;GO:0005368;GO:0005886;GO:0005887;GO:0006836;GO:0008028;GO:0010940;GO:0015171;GO:0015718;GO:0015734;GO:0016020;GO:0016021;GO:0016323;GO:0071705;GO:0089718;	K05046	-	P	KOG3659;12NMW;09U0F;0DHIB;1CQKB;0V4BE;04FH3	solute carrier family 6 member 13 [Source:NCBI gene;Acc:100858230]	100858230	F1NN76
ENSGALG00000014943	17.6001	3.9819	31.2182	7.84003	2.97086	5.24109e-05	0.0111028	Up Regulation	Z	24164781	24196348	+	2429	FAM169A	-	-	-	S	09U7T;13NJB;0DFHH;04EKX;0IK9K;0V56Y;1CQ7A	family with sequence similarity 169 member A [Source:NCBI gene;Acc:431595]	431595	A0A3Q3AP60
ENSGALG00000046616	105.933	69.5375	142.328	2.04677	1.03335	5.50022e-05	0.0115005	Up Regulation	3	16985845	16997906	+	2807	CHGB	GO:0030141;	-	-	-	-	chromogranin B [Source:NCBI gene;Acc:421312]	-	-
ENSGALG00000007867	137.924	88.1123	187.736	2.13064	1.09129	6.11331e-05	0.0126185	Up Regulation	11	1334504	1345280	-	2730	SLC9A5	GO:0006812;GO:0006814;GO:0006885;GO:0015299;GO:0015385;GO:0016021;GO:0055085;	-	-	P	0V5TC;KOG1966;1CQSR;09UTU;0DG38;12RCT	solute carrier family 9 member A5 [Source:NCBI gene;Acc:425403]	-	-
ENSGALG00000052429	7.36529	2.63251	12.0981	4.59565	2.20027	7.18078e-05	0.0146343	Up Regulation	13	715340	723544	-	2379	-	GO:0005509;GO:0005509;GO:0005509;GO:0005886;GO:0005886;GO:0005887;GO:0007155;GO:0007155;GO:0007155;GO:0007155;GO:0007156;GO:0007156;GO:0016020;GO:0016020;GO:0016020;GO:0016021;	-	-	-	-	-	-	-
ENSGALG00000051188	137.005	52.3207	221.69	4.23714	2.08309	8.73394e-05	0.0175771	Up Regulation	KZ626819.1	1139	38348	-	6788	-	-	-	-	-	-	class I histocompatibility antigen, F10 alpha chain-like [Source:NCBI gene;Acc:107054704]	-	-
ENSGALG00000016740	3.87987	0.387659	7.37208	19.0169	4.24921	9.30067e-05	0.0184865	Up Regulation	1	131975543	132105662	+	2181	OCA2	GO:0005765;GO:0005789;GO:0007286;GO:0008283;GO:0010008;GO:0016021;GO:0030318;GO:0033162;GO:0042438;GO:0043473;GO:0048066;GO:0055085;	K24200	-	P	KOG2639;04JGC;0VAVE;0DNFB;12QRX;1CQF6;09ZU0	OCA2 melanosomal transmembrane protein [Source:NCBI gene;Acc:428009]	428009	-
ENSGALG00000026161	56.0881	76.539	35.6372	0.465609	-1.10281	9.53712e-05	0.0185153	Down Regulation	28	991209	993646	+	1656	-	GO:0005216;GO:0005216;GO:0005244;GO:0005249;GO:0005249;GO:0005249;GO:0005251;GO:0005267;GO:0006811;GO:0006811;GO:0006811;GO:0006813;GO:0006813;GO:0006813;GO:0008076;GO:0008076;GO:0008076;GO:0016020;GO:0016020;GO:0016020;GO:0016021;GO:0016021;GO:0034765;GO:0051260;GO:0051260;GO:0055085;GO:0055085;GO:0071805;GO:0071805;	-	-	-	-	-	-	-
ENSGALG00000051320	8.8822	14.9753	2.78905	0.186243	-2.42474	9.54515e-05	0.0185153	Down Regulation	6	31578435	31581488	-	3054	-	GO:0003676;GO:0003676;GO:0004523;GO:0004523;GO:0015074;GO:0015074;GO:0090502;	-	-	-	-	-	-	-
ENSGALG00000052108	242.395	55.4094	429.38	7.74923	2.95405	0.000102922	0.0197268	Up Regulation	1	32731631	32734564	-	2934	-	GO:0003676;GO:0003676;GO:0004190;GO:0004190;GO:0004523;GO:0004523;GO:0006508;GO:0006508;GO:0015074;GO:0015074;GO:0016787;GO:0046718;GO:0046872;GO:0090502;	-	-	-	-	-	-	-
ENSGALG00000019553	24.8665	10.8964	38.8366	3.56417	1.83357	0.00011146	0.0211118	Up Regulation	2	67656284	67662678	-	2120	SERPINB10B	GO:0000785;GO:0003677;GO:0004867;GO:0005615;GO:0005615;GO:0005615;GO:0005634;GO:0005654;GO:0005694;GO:0006325;GO:0010466;GO:0010951;GO:0030261;GO:0030261;GO:0030414;GO:0031490;GO:0043362;GO:0000785;GO:0003677;GO:0004867;GO:0005615;GO:0005615;GO:0005615;GO:0005634;GO:0005654;GO:0005694;GO:0006325;GO:0010466;GO:0010951;GO:0030261;GO:0030261;GO:0030414;GO:0031490;GO:0043362;	K13963	-	B;V	0DF5U;KOG2392;12QSH;04FHU;1CRHU;0V4H4;09W3S	serpin peptidase inhibitor, clade B (ovalbumin), member 10 B [Source:NCBI gene;Acc:395715]	395715	O73790
ENSGALG00000000607	59.7341	38.5773	80.8909	2.09685	1.06822	0.000123654	0.0229013	Up Regulation	26	349399	353524	+	2269	GPR37L1	GO:0003085;GO:0004930;GO:0004930;GO:0005886;GO:0005886;GO:0007186;GO:0007193;GO:0008528;GO:0016021;GO:0021940;GO:0036505;GO:0042277;GO:0043235;GO:0043410;GO:0043410;GO:0045665;GO:0045879;GO:0048712;GO:1903206;	-	-	T	KOG3656;0DIFE;04M1C;1CT63;13ME3;0V82W;09X4C	G protein-coupled receptor 37 like 1 [Source:NCBI gene;Acc:421176]	-	-
ENSGALG00000047313	93.4527	23.5279	163.378	6.94399	2.79576	0.000124345	0.0229013	Up Regulation	5	182102	189519	-	2739	-	GO:0005739;GO:0008080;GO:0047961;GO:0005739;GO:0008080;GO:0047961;GO:0005739;GO:0008080;GO:0047961;GO:0005739;GO:0008080;GO:0047961;GO:0005739;GO:0008080;GO:0047961;	-	-	-	-	glycine N-acyltransferase-like protein 3 [Source:NCBI gene;Acc:107050382]	-	-
ENSGALG00000008823	38.0628	53.2276	22.8979	0.430189	-1.21696	0.000126347	0.0229013	Down Regulation	1	22456440	22477009	+	2504	IQUB	GO:0001669;GO:0005515;GO:0007224;GO:0031514;GO:0060271;GO:0005515;GO:0005515;	-	-	S	0IEKT;04F4P;1CTSU;0V8MA;0DEPR;09TY8;12SDD	IQ motif and ubiquitin domain containing [Source:NCBI gene;Acc:417754]	417754	A0A3Q2UC32
ENSGALG00000012339	362.609	253.951	471.267	1.85574	0.891994	0.000127115	0.0229013	Nodiff	5	58016047	58042735	+	3188	ATL1	GO:0003924;GO:0003924;GO:0005525;GO:0005737;GO:0005783;GO:0007029;GO:0016021;GO:0042802;GO:0051260;GO:0071782;GO:0098826;GO:1990809;GO:0003924;GO:0005525;	K17339	EC:3.6.5.-	S;K	04MKA;1CSCT;KOG2037;09WD3;0DHNC;12SCZ;0V7BI	atlastin GTPase 1 [Source:NCBI gene;Acc:423577]	423577	F1NAM6
ENSGALG00000012156	153.677	101.936	205.418	2.01516	1.0109	0.00012869	0.0229013	Up Regulation	7	29190336	29372124	-	2476	DPP10	GO:0006508;GO:0008076;GO:0008236;GO:0016020;GO:0044325;GO:1903078;GO:0006508;GO:0008236;	K23014	-	O	0DJEJ;KOG2100;1CU70;04HQI;09URM;0V52H;12P87	dipeptidyl peptidase like 10 [Source:NCBI gene;Acc:424280]	424280	-
ENSGALG00000040880	136.698	76.2253	197.172	2.5867	1.37111	0.000129442	0.0229013	Up Regulation	20	10803308	10815864	-	456	EDN3	GO:0001755;GO:0002690;GO:0003100;GO:0005179;GO:0005576;GO:0005615;GO:0006874;GO:0007166;GO:0008284;GO:0008284;GO:0010460;GO:0010468;GO:0010961;GO:0014826;GO:0019229;GO:0030072;GO:0030182;GO:0030318;GO:0030334;GO:0030593;GO:0031708;GO:0042310;GO:0043406;GO:0045597;GO:0045840;GO:0046887;GO:0048016;GO:0048070;GO:1901381;	-	-	-	-	endothelin 3 [Source:NCBI gene;Acc:768509]	-	-
ENSGALG00000009573	19.6633	2.61747	36.7091	14.0247	3.80989	0.000137386	0.0239522	Up Regulation	4	24927202	24945212	+	1052	ANXA10	GO:0005509;GO:0005544;GO:0004859;GO:0005509;GO:0005544;	K17097	-	U	1CYIV;12PZX;04MFW;0DPJY;0A1Y1;0VCTG;KOG0819	annexin A10 [Source:NCBI gene;Acc:770326]	770326	-
ENSGALG00000015753	3.22591	5.96935	0.482466	0.0808239	-3.62907	0.000138358	0.0239522	Down Regulation	Z	67243630	67276948	+	2634	-	GO:0000166;GO:0004383;GO:0004383;GO:0004383;GO:0004672;GO:0004672;GO:0005524;GO:0005524;GO:0006182;GO:0006182;GO:0006182;GO:0006468;GO:0006468;GO:0007601;GO:0009190;GO:0009190;GO:0016020;GO:0016021;GO:0016829;GO:0016849;GO:0016849;GO:0035556;GO:0035556;GO:0050896;GO:0004383;GO:0004672;GO:0005524;GO:0006182;GO:0006468;GO:0009190;GO:0016849;GO:0035556;	-	-	T	04FCV;0DPWT;0A28V;12S31;0V8B6;KOG1023;1CYWA	natriuretic peptide receptor A/guanylate cyclase A (atrionatriuretic peptide receptor A) [Source:NCBI gene;Acc:431640]	-	-
ENSGALG00000013484	6.57863	11.5028	1.65444	0.143829	-2.79757	0.000140872	0.0241281	Down Regulation	27	7093741	7098525	+	1269	ZPBP2	GO:0001669;GO:0001675;GO:0002199;GO:0002638;GO:0005576;GO:0006665;GO:0007339;GO:0007339;GO:0032922;GO:0044297;GO:0046466;	-	-	O	12P5R;0DRMW;0IHHK;0A42I;1D0V1;04EQ8;0VEX8	zona pellucida binding protein 2 [Source:NCBI gene;Acc:404532]	404532	Q6PVW7
ENSGALG00000036097	20.1796	6.88835	33.4709	4.85906	2.28068	0.000148012	0.0250842	Up Regulation	2	74190751	74441847	+	2994	CDH18	GO:0005509;GO:0005886;GO:0007155;GO:0007156;GO:0016020;GO:0098609;GO:0005509;GO:0005886;GO:0007155;GO:0007156;GO:0016020;GO:0098609;	K06805	-	-	-	cadherin 18 [Source:NCBI gene;Acc:428490]	428490	-
ENSGALG00000054183	2.52652	0.12922	4.92382	38.1043	5.25188	0.000150192	0.0251884	Up Regulation	13	2474870	2477506	+	2637	-	GO:0005509;GO:0005886;GO:0007155;GO:0007156;GO:0016020;	-	-	-	-	protocadherin gamma-A5-like [Source:NCBI gene;Acc:112533402]	-	-
ENSGALG00000015020	139.753	194.063	85.4437	0.440288	-1.18348	0.000154377	0.0256233	Down Regulation	Z	24901868	24918432	-	1629	TMEM171	-	-	-	S	04JVM;13M4Y;09Z6N;0VA3Y;1CS0G;0IJCA;0DKNJ	transmembrane protein 174 [Source:NCBI gene;Acc:768886]	-	-
ENSGALG00000046931	5.26417	1.07017	9.45817	8.83803	3.14372	0.000171327	0.0281466	Up Regulation	5	26413152	26416554	-	1384	-	GO:0006637;GO:0016790;GO:0006637;GO:0016790;	-	-	-	-	acyl-CoA thioesterase 4 [Source:NCBI gene;Acc:428872]	-	-
ENSGALG00000047567	12.9443	19.4413	6.44732	0.331631	-1.59235	0.000186747	0.0303699	Down Regulation	33	5508183	5509697	+	1515	-	-	-	-	-	-	-	-	-
ENSGALG00000034458	11.7145	5.43901	17.99	3.30759	1.72578	0.000190682	0.0306998	Up Regulation	25	3328411	3329269	+	443	S100A1	GO:0005509;GO:0005654;GO:0005794;GO:0005829;GO:0008016;GO:0042802;	K23758	-	-	-	S100 calcium binding protein A1 [Source:NCBI gene;Acc:100858258]	100858258	A0A1D5PJJ4
ENSGALG00000053105	133.202	63.3944	203.009	3.20231	1.67911	0.000193322	0.0308166	Up Regulation	21	6596041	6600999	+	2165	RAP1GAP	GO:0005096;GO:0051056;GO:0005096;GO:0051056;	-	-	-	-	RAP1 GTPase activating protein 2 [Source:NCBI gene;Acc:769475]	-	-
ENSGALG00000009616	6.75834	2.44834	11.0683	4.52076	2.17657	0.000199613	0.0315076	Up Regulation	3	19747666	19838517	-	2605	SPATA17	GO:0005515;GO:0005516;GO:0005515;	-	-	Z	0DEQI;0VACR;0IKZ3;04JNS;12TD7;1CPE8;09ZFR	spermatogenesis associated 17 [Source:NCBI gene;Acc:421354]	-	-
ENSGALG00000050755	24.3652	5.06061	43.6699	8.62938	3.10926	0.000202912	0.0316817	Up Regulation	33	7572639	7574874	+	582	-	GO:0000978;GO:0000981;GO:0000981;GO:0000981;GO:0001501;GO:0001656;GO:0001759;GO:0003677;GO:0003677;GO:0003677;GO:0005634;GO:0005634;GO:0006355;GO:0006355;GO:0006357;GO:0009952;GO:0009954;GO:0042733;GO:0048856;GO:0060272;	-	-	-	-	homeobox C11 [Source:HGNC Symbol;Acc:HGNC:5123]	-	-
ENSGALG00000048818	4.23224	0.718461	7.74603	10.7814	3.43047	0.000204652	0.0316817	Up Regulation	KZ626833.1	407390	495126	-	2863	-	-	-	-	-	-	-	-	-
ENSGALG00000026584	38.1912	11.7868	64.5957	5.48036	2.45427	0.000220285	0.033777	Up Regulation	5	25716503	25748002	-	2439	-	GO:0004620;GO:0005509;GO:0009395;	-	-	-	-	phospholipase A2 group IVE-like 2 [Source:NCBI gene;Acc:771574]	-	-
ENSGALG00000052450	7.59231	2.61724	12.5674	4.80178	2.26357	0.000223805	0.033993	Up Regulation	31	963479	963643	+	165	-	GO:0006355;GO:0006355;	-	-	-	-	-	-	-
ENSGALG00000050468	2.17161	4.20747	0.135752	0.0322645	-4.95391	0.000232378	0.0349653	Down Regulation	KZ626838.1	1280862	1282907	-	2046	-	GO:0003676;GO:0003676;GO:0004523;GO:0004523;GO:0015074;GO:0015074;GO:0090502;	-	-	-	-	-	-	-
ENSGALG00000048246	66.1076	87.7808	44.4344	0.506197	-0.98223	0.000263714	0.0393129	Nodiff	21	1795181	1799996	+	1642	-	GO:0043130;	-	-	-	-	uncharacterized LOC107049018 [Source:NCBI gene;Acc:107049018]	-	-
ENSGALG00000052976	116.547	80.5216	152.572	1.89479	0.922042	0.000272403	0.0402357	Nodiff	4	91239008	91253657	-	3841	-	GO:0045127;GO:0045127;	-	-	-	-	N-acetyl-D-glucosamine kinase-like [Source:NCBI gene;Acc:107051359]	-	-
ENSGALG00000045815	32.7471	47.2609	18.2332	0.385799	-1.37408	0.000277238	0.0405775	Down Regulation	1	137712483	137721326	+	720	-	GO:0005737;GO:0005911;GO:0005925;GO:0045216;GO:0046872;GO:0098609;GO:1900026;GO:2001046;	-	-	-	-	-	-	-
ENSGALG00000006361	90.2326	33.5205	146.945	4.38372	2.13216	0.000287094	0.0416415	Up Regulation	9	4921468	4924316	-	2263	NEU4	GO:0004308;GO:0004308;GO:0004308;GO:0005764;GO:0005886;GO:0006516;GO:0006516;GO:0006689;GO:0006689;GO:0009313;GO:0010977;GO:0019866;GO:0043005;GO:0052794;GO:0052794;GO:0052796;GO:0052796;	K12357	EC:3.2.1.18	S	0IFVF;0VAZB;12RDV;09YDG;0DGG2;1CR5Q	sialidase 4 [Source:NCBI gene;Acc:429131]	429131	-
ENSGALG00000010223	37.2335	20.6395	53.8275	2.60799	1.38294	0.00030055	0.0432041	Up Regulation	1	37868999	37878734	+	795	-	GO:0005576;GO:0005576;GO:0005615;GO:0016020;GO:0016021;	-	-	S;T	1CYRN;KOG3017;0VCZY;0DPSJ;0A24F;13KW5;04EYQ	-	-	-
ENSGALG00000010433	660.236	850.151	470.32	0.553219	-0.854077	0.000336455	0.0479373	Nodiff	8	21981390	21991112	-	2791	-	GO:0017064;	-	-	-	-	fatty acid amide hydrolase [Source:NCBI gene;Acc:424614]	-	-
ENSGALG00000042375	51.2909	69.2844	33.2974	0.480591	-1.05712	0.000339517	0.0479494	Down Regulation	2	131213171	131252088	+	8587	-	GO:0003676;GO:0005524;GO:0008270;GO:0003676;GO:0005524;GO:0008270;	-	-	-	-	ATP-dependent DNA helicase Q4-like [Source:NCBI gene;Acc:101748706]	-	-
ENSGALG00000049105	7.07268	11.4255	2.71991	0.238057	-2.07062	0.000352485	0.049348	Down Regulation	5	18176267	18178276	-	213	-	GO:0016020;GO:0016021;	-	-	-	-	-	-	-
